# Supplementary material for: JMJD1B Demethylates H4R3me2s and H3K9me2 to Facilitate Gene Expression for Development of Hematopoietic Stem and Progenitor Cells
Source: PubMed Central journal article supplement (PMC5933860; doi:10.1016/j.celrep.2018.03.051), 2018-04-10
Supplement: NIHMS961949-supplement-1.pdf [file NIHMS961949-supplement-1.pdf]

Cell Reports, Volume 23

## Supplemental Information

### **JMJD1B Demethylates H4R3me2s and H3K9me2 to Facilitate Gene Expression for Development of Hematopoietic Stem and Progenitor Cells**

**Sihui Li, Shafat Ali, Xiaotao Duan, Songbai Liu, Juan Du, Changwei Liu, Huifang Dai, Mian Zhou, Lina Zhou, Lu Yang, Peiguo Chu, Ling Li, Ravi Bhatia, Dustin E. Schones, Xiwei Wu, Hong Xu, Yuejin Hua, Zhigang Guo, Yanzhong Yang, Li Zheng, and Binghui Shen**

**Supplemental Table S1: Methylated histone tail peptide substrates\* and antibodies used in western blotting analysis. Related to Figure 1 and Figure 3**

| Substrates | Sequences                                 | Peptide Resources    | Antibody Resources           |
|------------|-------------------------------------------|----------------------|------------------------------|
| H3K9me2    | ARTKQTAR K(Me2) - STGGKAPRKQLAGGK(Biotin) | AnaSpec<br>64627-025 | Abcam<br>Ab1220              |
| H3K4me2    | ARTK(Me2)QTARKSTGGKAPRKQLA-GGK(Biotin)    | AnaSpec<br>64356-025 | Active Motif<br>39679        |
| H3R2me2s   | AR(Me2s)TKQTARKSTGGKAPRKQLA-GGK(Biotin)   | AnaSpec<br>64631-025 | Active Motif<br>39703        |
| H3R2me2a   | AR(Me2a)TKQTARKSTGGKAPRKQLA-GGK(Biotin)   | AnaSpec<br>64630-025 | Abcam<br>Ab80075             |
| H3R2me1    | AR(Me1)TKQTARKSTGGKAPRKQLAGGK(Biotin)     | AnaSpec<br>64629-025 | Abcam<br>ab15584             |
| H3R8me2s   | ARTKQTAR(Me2s)KSTGGKAPRKQLA-GGK(Biotin)   | AnaSpec<br>65351-025 | Said Sif<br>Ohio State Univ. |
| H3R8me1    | ARTKQTAR(Me1)KSTGGKAPRKQLA-GGK(Biotin)    | AnaSpec<br>64607-025 | Active Motif<br>39673        |
| H3R17me2a  | ARTKQTARKSTGGKAPR(Me2a)-KQLAGGK(Biotin)   | AnaSpec<br>64634-025 | Active Motif<br>39709        |
| H3R26me2a  | APRKQLATKAAR(Me2a)KSAPATGGVK-GGK(Biotin)  | AnaSpec<br>65261-025 | EMD<br>Millipore<br>07-215   |
| H4R3me2s   | SGR(Me2s)GKGGKGLGKGGAKRHRKV-GGK(Biotin)   | AnaSpec<br>65424-025 | Active Motif<br>61187        |
| H4R3me2a   | SGR(Me2a)GKGGKGLGKGGAKRHRKV-GGK(Biotin)   | AnaSpec<br>64976-025 | Active Motif<br>39706        |
| H4R3me1    | SGR(Me1)GKGGKGLGKGGAKRHRKV-GGK(Biotin)    | AnaSpec<br>64977-025 | Abcam<br>Ab17339             |

\*Custom peptide synthesis

**Supplemental Table S2: Peptides\* for arginine demethylation assay by mass spectrometry. Related to Figure 2**

| <b>Peptides</b> | <b>Sequences</b>                 | <b>Resources</b>   |
|-----------------|----------------------------------|--------------------|
| H3K9me2         | ARTKQTAR K(Me2) STGGKAPRKQLATKAA | Anaspec<br>62622-5 |
| H4R3me2s        | SGR(Me2s)GKGGKGLGKGGAK           | Anaspec<br>62392-1 |
| H4R3me2a        | SGR(Me2a)GKGGKGLGKGGAK           | Anaspec<br>62622-3 |
| H3R2me1         | SGR(Me1)GKGGKGLGKGGAK            | Anaspec<br>62392-2 |

\*Custom peptide synthesis

**Supplemental Table S3: Summary of ChIP-Seq and alignment. Related to Figure 4 and Figure 5.**

| Sample            | Total Reads | Unique Aligned Reads | % Aligned | Non-redundant Reads |
|-------------------|-------------|----------------------|-----------|---------------------|
| WT-HSPC-INPUT     | 58,792,986  | 49,010,628           | 83.4%     | 46,407,639          |
| WT-HSPC-H4R3ME2S  | 117,604,443 | 92,976,262           | 79.1%     | 83,718,326          |
| WT-HSPC-H3K9ME2   | 115,014,233 | 87,872,149           | 76.4%     | 81,224,010          |
| WT-HSPC-H4        | 112,649,572 | 81,278,139           | 72.2%     | 71,254,082          |
| WT-BMC-INPUT      | 62,493,414  | 51,494,573           | 82.4%     | 48,205,709          |
| WT-BMC-H4R3ME2S   | 40,909,933  | 33,873,424           | 82.8%     | 27,724,518          |
| WT-BMC-H3K9me2    | 50,164,784  | 38,526,554           | 77.0%     | 36,238,249          |
| JKO-HSPC-INPUT    | 54,501,763  | 45,248,507           | 83.4%     | 42,962,961          |
| JKO-HSPC-H4R3ME2S | 102,856,353 | 83,608,487           | 81.3%     | 76,948,453          |
| JKO-HSPC-H3K9ME2  | 101,544,449 | 83,127,518           | 81.9%     | 77,417,891          |
| JKO-HSPC-H4       | 107,300,436 | 77,308,068           | 72.0%     | 67,765,370          |
| JKO-BMC-INPUT     | 63,118,338  | 51,441,445           | 82.0%     | 48,083,779          |
| JKO-BMC-H4R3ME2S  | 42,059,087  | 32,848,146           | 78.0%     | 30,027,216          |
| JKO-BMC-H3K9ME2   | 53,731,355  | 43,200,009           | 80.0%     | 40,995,991          |

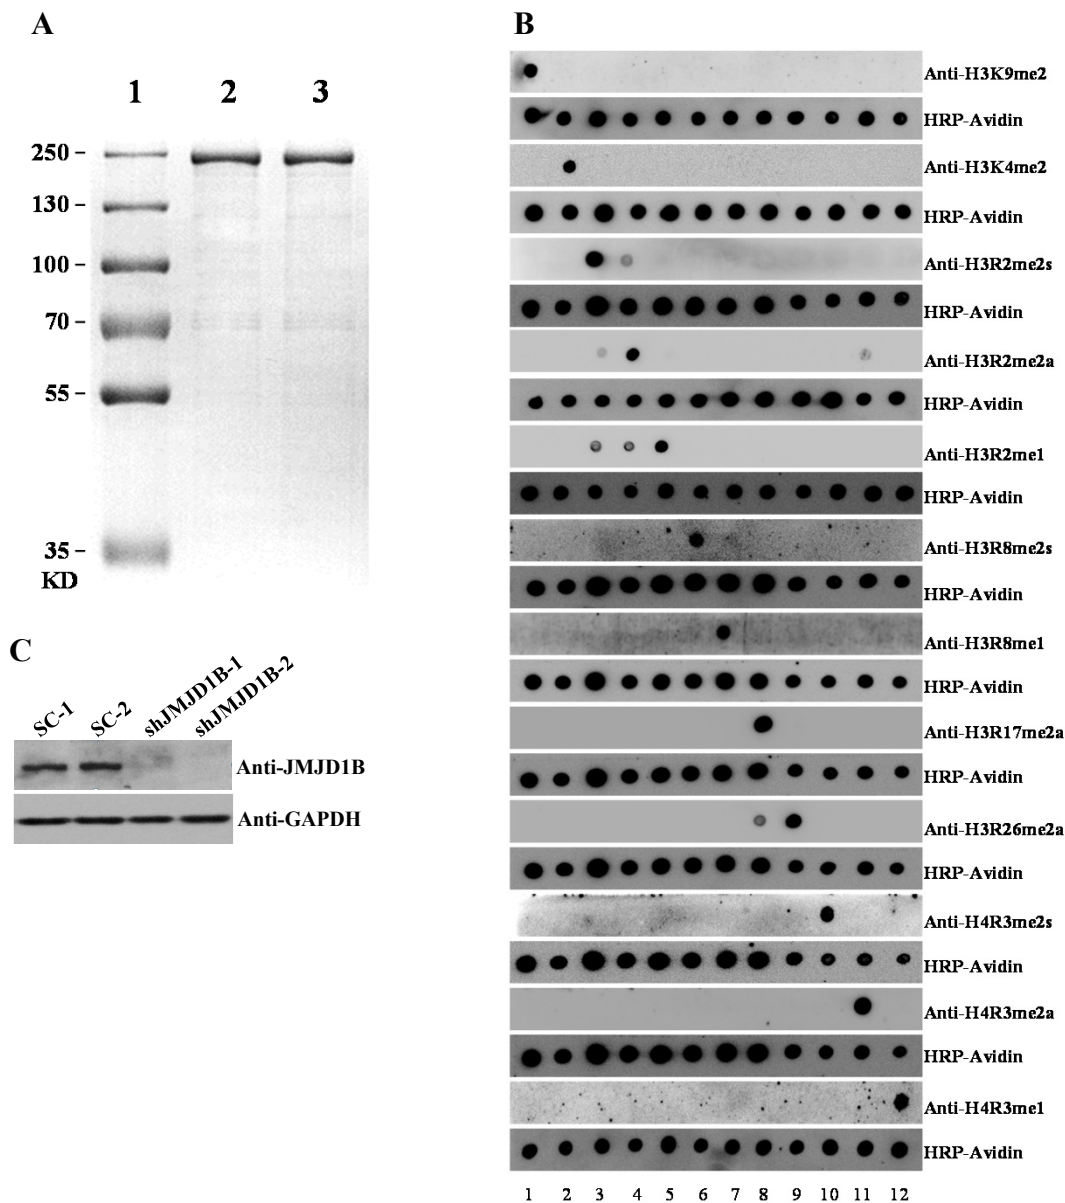

**Supplemental Figure S1. Validation of purity of recombinant JMJD1B proteins, specificity of histone antibodies, and siRNA efficiency. Related to Figures 1-3.** (A) JMJD1B expression and purification. PEZ-M12-JMJD1B (isoform 1) was purchased from GeneCopoeia (EX-E1505-M12) with a 3 x FLAG tag. JMJD1B protein After expression in HEK293T cells, the recombinant proteins were purified using M2 magnetic beads (Sigma). Shown is the Coomassie Brilliant Blue-stained gel demonstrating the purity of the WT (lane 2) and mutant (H1560A/D1562A/H1689A) (lane 3) JMJD1B proteins, along with molecular weight markers (Lane 1). (B) Dot blot analyses verify the specificity of histone antibodies. Equal amount (1  $\mu$ g) of biotin-synthetic modified histone peptides were dotted on the nitrocellulose membrane at the following order from left to right: 1. H3K9me2; 2. H3K4me2; 3. H3R2me2s; 4. H3R2me2a; 5. H3R2me1; 6. H3R8me2s; 7. H3R8me1; 8. H3R17me2a; 9. H3R26me2a; 10. H4R3me2s; 11. H4R3me2a; 12. H4R3me1. Standard dot blot protocol was performed using indicated antibodies against specific forms of modified histones. For controls, membranes were stripped and reprobated with HRP-avidin. (C) Knockdown of JMJD1B by shRNA in 293T cells. 293T cells were transfected with scrambled shRNA vectors (SC-1: Cat No. SHC001 and SC-2: SHC002) or shRNA vectors against JMJD1B [shJMJD1B-1: Cat No. TRCN0000017093 and shJMJD1B-2: (Sigma, Cat No. TRCN0000017093)]. 48 h post-transfection, the JMJD1B level was analyzed with western blot using the anti-JMJD1B antibody. GAPDH was used as a loading control.

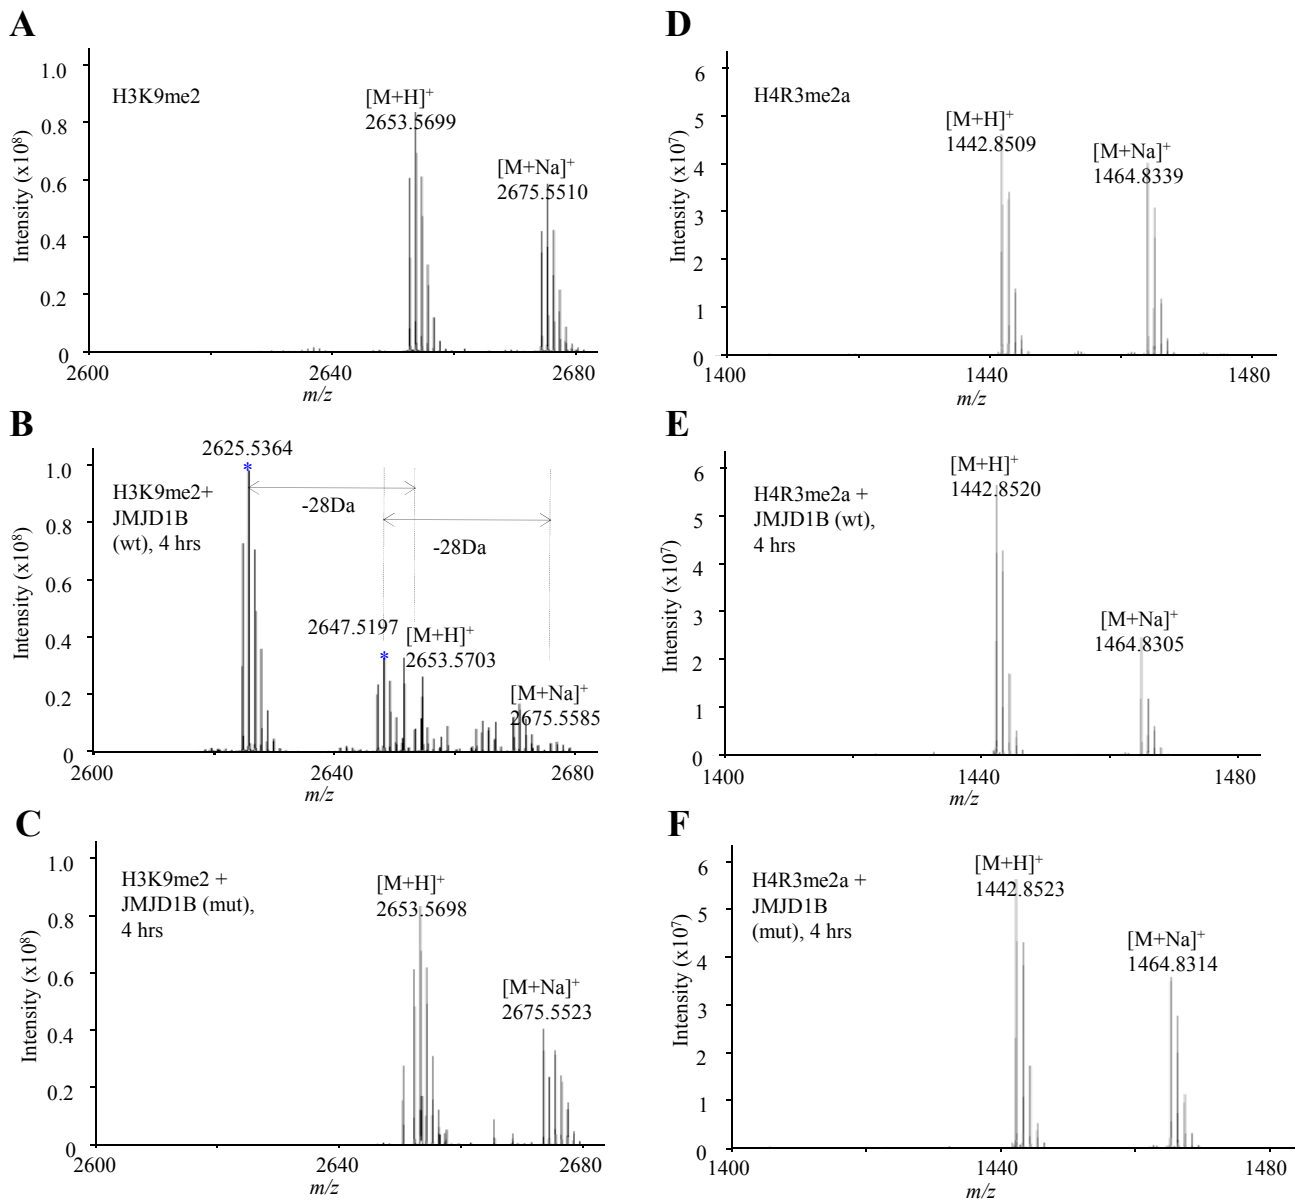

**Supplemental Figure S2. JMJD1B demethylase activity assay on H3K9me2 and H4R3me2a by mass spectrometry. Related to Figure 2.** (A)-(C) H3K9me2 is demethylated by JMJD1B. The H3K9me2 peptide substrate (18  $\mu$ M) was incubated at 37°C for 4 h in demethylation buffer alone (A), or with 0.5  $\mu$ M wild-type JMJD1B (wt) (B) or 0.5  $\mu$ M mutant JMJD1B (mut) (C). The reaction mixtures were analyzed by mass spectrometry. Representative mass spectrometry images are shown, and (\*) indicates the demethylation products in the reactions containing the H3K9me2 peptide and WT JMJD1B (B). No product was found in the reaction with the mutant JMJD1B (C). (D)-(F) H4R3me2a is not demethylated by JMJD1B. The H4R3me2a peptide substrate (34  $\mu$ M) was incubated at 37°C for 4 h in demethylation buffer alone (D), or with 0.5  $\mu$ M of JMJD1B (wt) (E) or 0.5  $\mu$ M of JMJD1B (mut) (F). The reaction mixtures were analyzed by mass spectrometry. Representative mass spectrometry images are shown, demonstrating the absence of products in the reactions containing JMJD1B and the H4R3me2a peptide (E).

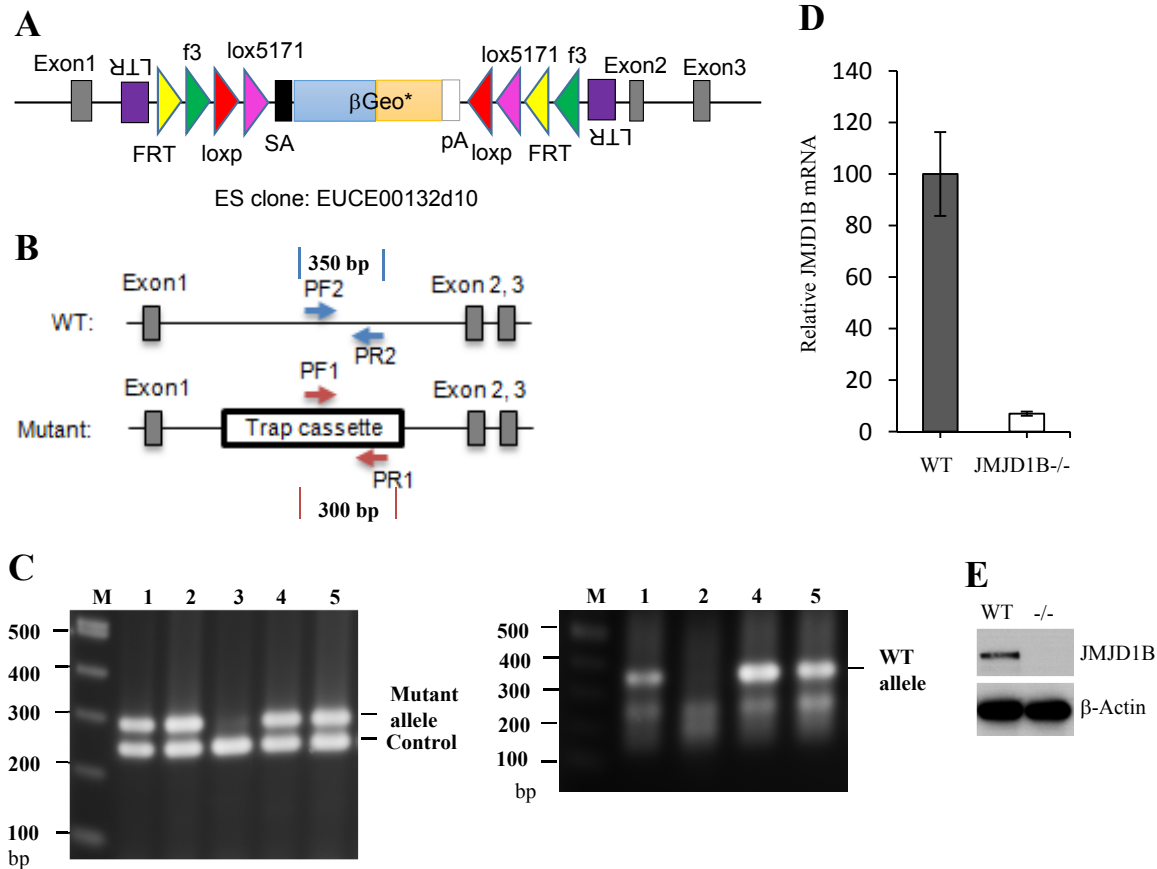

**Supplemental Figure S3. Knockout of JMJD1B via gene trap technology. Related to Figures 5 and Figure 7.** (A) Schematic map indicating insertion of the gene trap cassette (rFlipROSAbeta-Geo\*) into intron 1 of JMJD1B. The gene cassette carrying a splicing acceptor (SA) at the 5' end and a polyA sequence at the 3' end causes premature termination of transcription and splicing, abolishing JMJD1B expression. (B) and (C) Screening of JMJD1B mutant mice by PCR. Panel b shows the strategy and primers for PCR amplification. The mutant allele was detected by PCR using the PF1/PR1 primers, which correspond to the DNA sequences of the trap cassette. The WT allele, at the trap cassette insertion site, was detected by PCR using the PF2/PR2 primers. Panel c shows representative images of agarose gel electrophoresis of PCR products amplified by PF1/PR1 (left) and PF2/PR2 (right). In the first PCR reaction (left), a pair of control primers corresponding to the actin gene was used as an internal control to ensure the quality of the PCR reactions. The first PCR reaction detected the mutant allele, and the second PCR reaction detected the WT allele. Mouse #3 (WT) carried no mutant allele; Mice #1, 4, and 5 (heterozygous) carried both the WT and mutant alleles; and mouse #2 (mutant) carried only the mutant allele. (D) mRNA levels of JMJD1B in WT and JMJD1B<sup>-/-</sup> MEF cells (E13.5). Total RNA was extracted from WT and JMJD1B<sup>-/-</sup> cells and real-time RT-PCR was used to quantify the levels of JMJD1B mRNA and control  $\beta$ -actin mRNA. The JMJD1B mRNA level was normalized to the corresponding  $\beta$ -actin mRNA level. The normalized JMJD1B mRNA level in the WT cells was arbitrarily set to 100. The values are the means  $\pm$  s.d. of three independent assays. (E) Western blot to detect JMJD1B protein levels in WT and JMJD1B<sup>-/-</sup> embryos (E11.5). Whole cell extracts were prepared from WT and JMJD1B embryos and resolved by 4-20% SDS-PAGE. The JMJD1B protein was detected by western blotting using an anti-JMJD1B antibody (Bethyl).

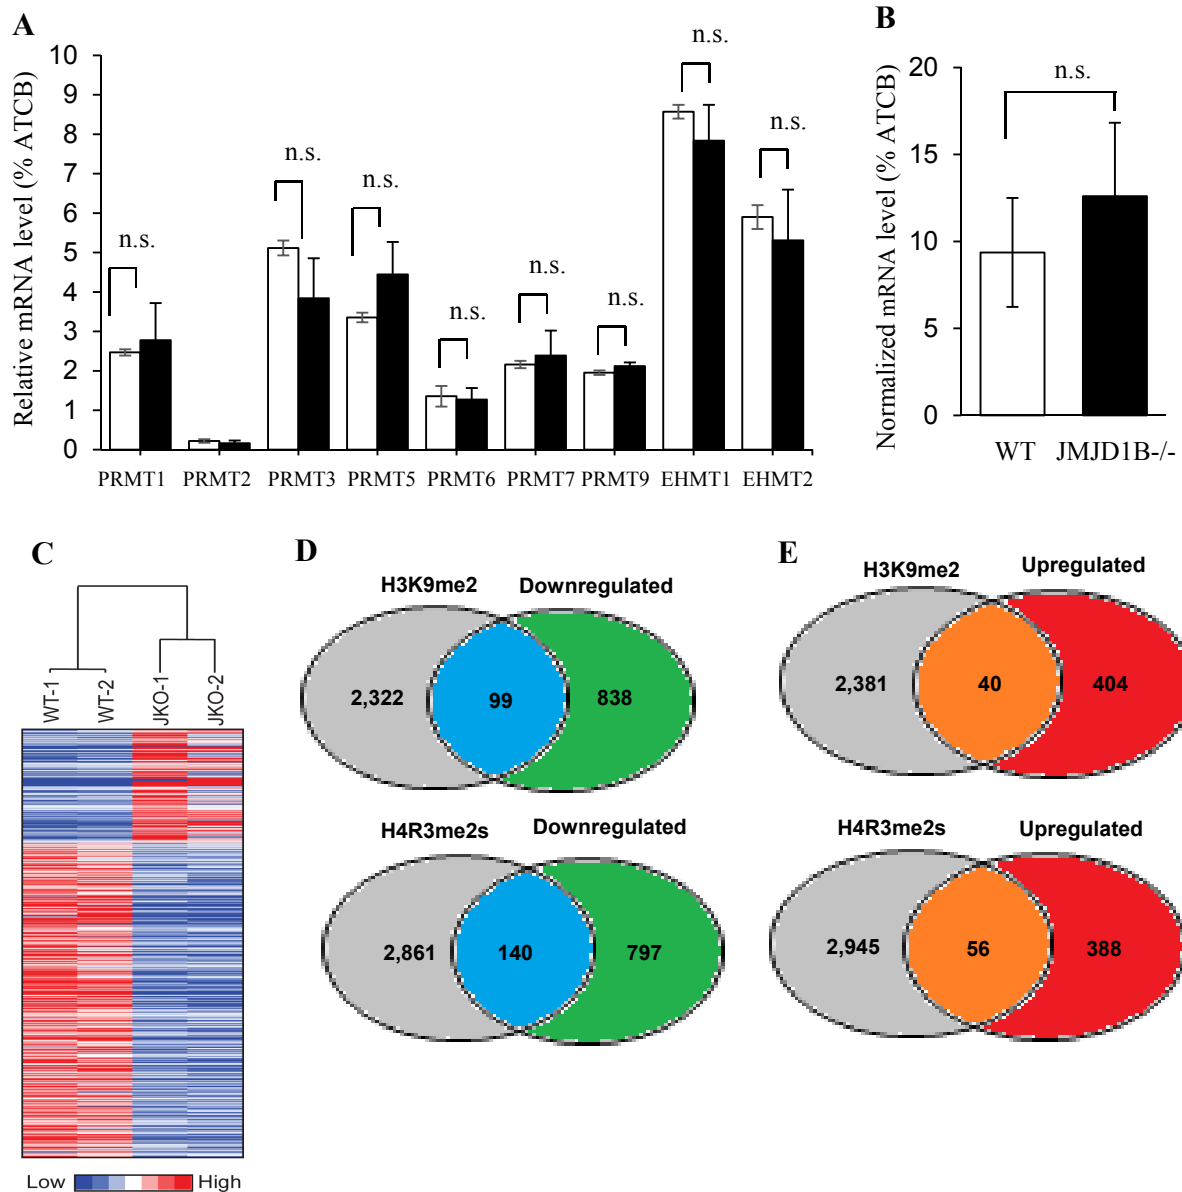

**Supplemental Figure S4. Gene expression profiles in WT and JMJD1B<sup>-/-</sup> HSPCs. Related to Figure 5. (A) and (B) Relative expression of protein arginine and lysine methyltransferases in WT and JMJD1B<sup>-/-</sup> HSPCs. (A) The mRNA levels of PRMTs and EHMTs were determined by RNA-Seq. The relative mRNA level of PRMTs and EHMTs was normalized with corresponding mRNA level of  $\beta$ -actin, which is arbitrarily set as 100. Values are means  $\pm$  s.d. for two biological replicates for each genetic background. (B) The mRNA levels of PRMT5 were determined by quantitative PCR. The relative mRNA level of PRMTs was normalized with corresponding mRNA level of  $\beta$ -actin, which was arbitrarily set as 100. Values are means  $\pm$  s.d. for three biological replicates for each genetic background. p value: Student's t-test. (C) Heatmap of gene expression profilings in WT and JMJD1B<sup>-/-</sup> (JKO) HSPCs. (D) and (E) Intersection of the gene lists with increased H3K9me2 or H4R3me2s density and the gene lists of down- (Panel D) or up-regulated genes (Panel E) (JMJD1B<sup>-/-</sup> vs WT). Genes with FC of JMJD1B<sup>-/-</sup>/WT in H4R3me2s or H3K9me2 signal no less than 1.5-fold and the JKO ChIP reads in H4R3me2s or H3K9me2  $\geq 15$  were selected as increased H3K9me2 or H4R3me2s genes. Genes with FC of JMJD1B<sup>-/-</sup>/WT in gene expression being less than or greater than 0 and  $p < 0.05$  were selected as down- and up-regulated genes.**



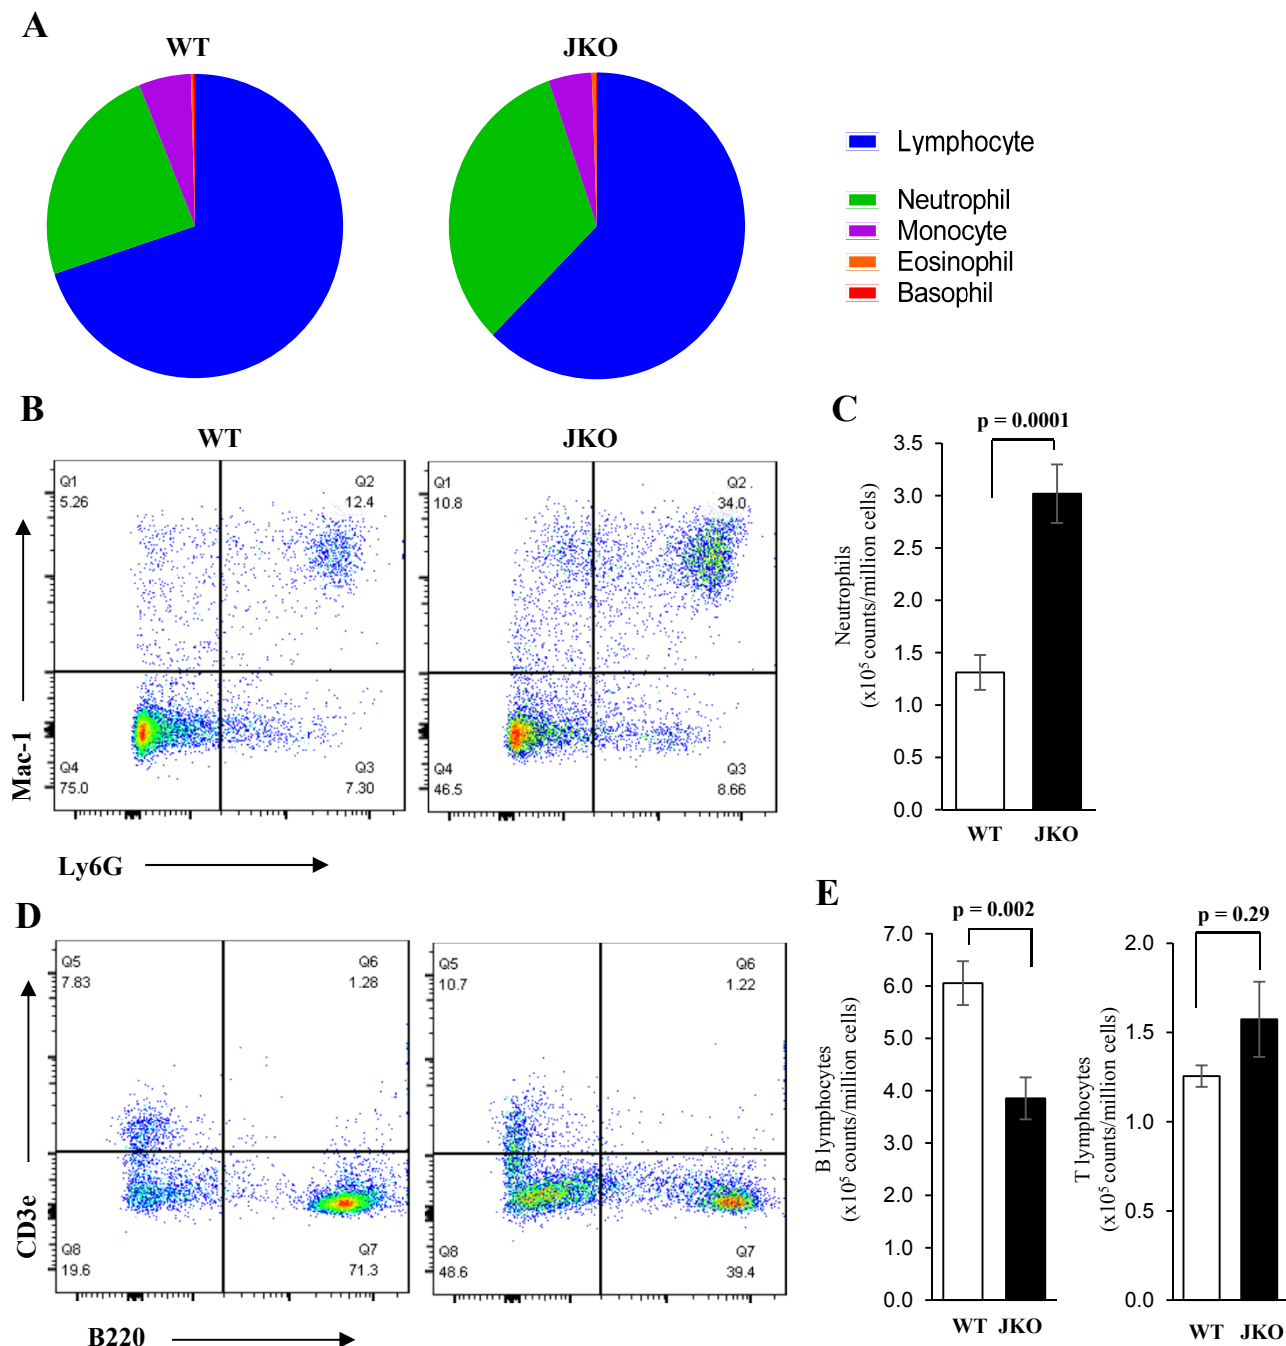

**Supplemental Figure S5: Different blood cell populations in WT and JMJD1B<sup>-/-</sup> (JKO) mice. Related to Figure 7.** (A) Complete blood count analysis and percentage distribution of lymphocytes, neutrophils, monocytes, eosinophils, and basophils in peripheral blood of wild-type (WT, n = 10) and JKO mice (n = 14). Representative flow cytometry analysis of (B, C) granulocyte population (Gr-1<sup>+</sup>, Mac-1<sup>+</sup>) and total number for each genotype (mean  $\pm$  s.e.m., n = 9), (D, E) B lymphocytes (B220<sup>+</sup>) and T lymphocytes (CD3e<sup>+</sup>) and total number for each genotype (mean  $\pm$  s.e.m., n = 9). P values were calculated using Student's t-test.

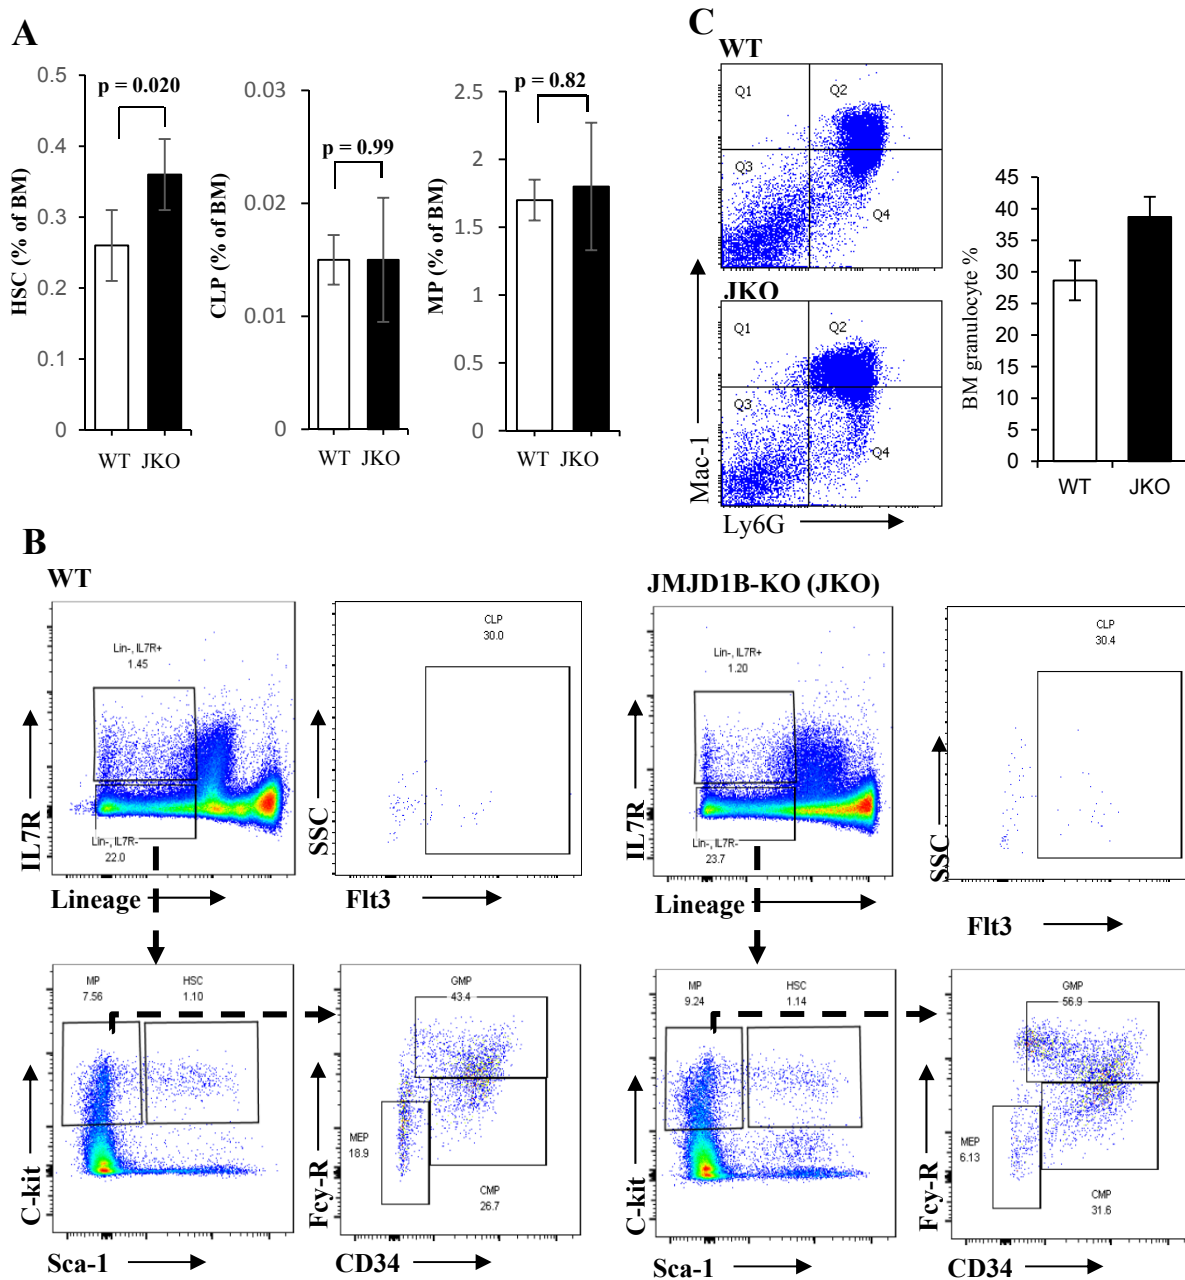

**Supplemental Figure S6: Bone marrow cell population analysis by flow cytometry. Related to Figure 7.** (A) Percentages of HSC and CLP (common lymphoid progenitor) and MP (myeloid progenitor) relative to input bone marrow cells. HSC are shown as Lin<sup>-</sup>c-Kit<sup>+</sup>Sca-1<sup>+</sup> and CLP as Lin<sup>-</sup>c-Kit<sup>+</sup>Sca-1<sup>+</sup>IL7R<sup>+</sup> cell populations by flow cytometry. Values are means  $\pm$  s.e.m of five biological replicates. P values were calculated using Student's t-test. (B) Representative flow cytometry analysis of bone marrow progenitor cell population compartments of age matched (22 weeks) WT (left 4 panels) and JMJD1B<sup>-/-</sup> mice (right 4 panels). Live bone marrow cells were stained for hematopoietic stem cell/progenitor cells expression marker (C-kit, Sca-1, Fcy-R, CD34, IL7R, Flt3, and CD150) along with lineage marker (Ter119, CD3, B220, NK1.1, Gr-1 and Mac-1). For CLP analysis, lineage negative and IL7R<sup>+</sup> were plotted for c-kit<sup>+</sup> and Sca-1<sup>+</sup> and then Flt3 positive (upper right plot). For MP analysis, lineage negative cells were divided for C-kit positive and SCA-1 negative cells (lower left plot) and Lin<sup>-</sup>, C-kit<sup>+</sup> population was further analyze using Fcy-R and CD34 markers (lower right plot). Common myeloid progenitor (CMP) were defined as (Lin<sup>-</sup>, C-kit<sup>+</sup>, CD34<sup>+</sup>, Fcy-R<sup>mid</sup>), GMP as (Lin<sup>-</sup>, C-kit<sup>+</sup>, CD34<sup>+</sup>, Fcy-R<sup>hi</sup>) and MEP as (Lin<sup>-</sup>, C-kit<sup>+</sup>, CD34<sup>-</sup>, Fcy-R<sup>-</sup>). For hematopoietic stem cell (HSC) analysis, lineage negative cells were stained for C-kit and SCA-1 positive fraction (lower left plot). (C) Granulocyte population (Gr-1<sup>+</sup>, Mac-1<sup>+</sup>) in WT and JMJD1B<sup>-/-</sup> mice (means  $\pm$  s.e.m of two biological replicates)

## Supplemental Experimental Procedures

### Cell culture

The 293T or primary MEF cells were cultured at 37°C in a 5% CO<sub>2</sub> standard tissue culture incubator. Dulbecco's modified Eagle's medium (DMEM, Corning Life Sciences, Corning, NY), supplemented with 10% fetal bovine serum (FBS, GE Healthcare Life Sciences, Logan, UT) and 1% penicillin-streptomycin (Thermo Fisher Scientific, Waltham, MA), was used for all routine maintenance of culture.

### JMJD1B knockout in mice

JMJD1B gene expression was disrupted via gene trap technology (Supplemental Figure S3A). Male chimeric mice generated via JMJD1B mutant embryonic stem cells (*neo*<sup>+</sup>) were crossed with female WT mice (C56BL/6 genetic background) to transmit the mutation through the germline, producing heterozygous mice on the B6.129P2 genetic background. Heterozygous (JMJD1B<sup>+/-</sup>) and homozygous (JMJD1B<sup>-/-</sup>) mice were selected with PCR (Supplemental Figure S3B and S3C). Homozygous knockout of JMJD1B in mice was verified by quantitative PCR to measure the mRNA levels in mouse endothelial fibroblast (MEF) cells, as well as tissue staining and western blotting to measure protein levels. No JMJD1B RNA or protein was detected *in vivo* (Supplemental Figure S3D and 3E). For phenotype characterization, we used nQuery to estimate the minimal number of mice needed for the study and Fisher exact test to calculate the p value. WT and JMJD1B<sup>-/-</sup> mice were randomly selected for phenotype characterization in a blind fashion. All protocols involving animals have been approved by the Institution Animal Care and

Use Committee (IACUC) of City of Hope in compliance with the Public Health Service Policy on Use of Laboratory Animals.

#### In vitro methylation, demethylation, and formaldehyde release assays

Recombinant WT and mutant (H1560A/D1562A/H1689A) JMJD1B were expressed as FLAG fusions using the 3xFLAG expression vector (pEZ-M12). After expression in HEK293T cells (ATCC), the proteins were purified using M2 beads, according to the manufacturer's instructions (Sigma-Aldrich). The biotin-tagged methylated histone peptide sequences and antibody resources for western blotting analysis are listed in Supplemental Tables S1 and S2. Other antibodies used in this study are also commercially available, including anti-H4 (Abcam, Cat No: ab187521), anti-JMJD1B (Cell Signaling, Cat No: 3314), HRP-labeled Streptavidin (Beyotime, Cat No: A0303), goat anti-rabbit IgG HRP (Pierce, Cat No: 31460), and goat anti-mouse IgG HRP (Pierce, Cat No: 31430). The specificity of histone antibodies was confirmed with dot blotting analysis using synthetic histone peptides (Supplemental Figure S1B).

For the demethylation reactions, the bulk histones, methylated recombinant histone H3 and H4, or synthetic peptide substrates were incubated with purified JMJD1B (0.5  $\mu$ M) in demethylation buffer in a final volume of 20  $\mu$ l at 37  $^{\circ}$ C. The reaction products were assayed either by western blot analysis or by using a formaldehyde release assay.

A modified version of formaldehyde release assay (Walport et al., 2016) was conducted to analyze the kinetic parameters of JMJD1B-catalyzed H4R3me2s and H3K9me2 demethylation. Briefly, JMJD1B (0.5  $\mu$ M) was incubated with varying concentrations of H4R3me2s and

H3K9me2 peptide substrates in a demethylation buffer at 37°C for 0, 10, 20, 30, 40, 50, 60 minutes. After stopping the reaction with addition of EDTA to a final concentration of 10 mM, the formaldehyde concentration in each reaction was measured using a fluorescence-based formaldehyde assay kit (Sigma, St. Louis, MO) and the  $K_m$ ,  $k_{cat}$ , and  $k_{cat}/K_m$  were calculated following the previously published protocol (Walport et al., 2016).

### Mass spectrometry analysis

34  $\mu$ M each of synthetic H4R3me2s, H4R3me2a, or H4R3me1 or 18  $\mu$ M of H3K9me2 peptide substrates (Supplemental Table S1) were incubated in the absence or presence of WT (0.5  $\mu$ M) or mutant (0.5  $\mu$ M) JMJD1B in a demethylation buffer. After 2 or 4 h of incubation, the reaction mixtures were desalted and lyophilized. The peptide (5  $\mu$ g in 100  $\mu$ l demethylation buffer), was dissolved in 1 ml of 2% acetonitrile/0.1% TFA and desalted by passing through tC18 cartridges (Waters). The cartridges were activated and equilibrated using 1 ml 80% acetonitrile/0.1% TFA, followed by 1 ml 0.1% TFA (2X). The reaction mixture was loaded onto the cartridges, then washed with 1 ml 0.1% TFA (2X). The cartridges were eluted with 1 ml 80% acetonitrile/0.1% TFA and lyophilized. The lyophilized samples were then dissolved in 50% methanol/0.1% FA and analyzed by a 9.4T Q- FT-ICR MS hybrid (Solarix, Bruker Daltonics Bremen, Germany) at the National Center of Biomedical Analysis (Beijing, China).

### JMJD1B overexpression and knockdown in HEK293T cells

To overexpress JMJD1B and observe its impact on arginine demethylation of H4R3me2s within the cells, PEZ-M12-JMJD1B was transfected into HEK293T cells (ATCC) using the Polyjet transfection reagent (Signagen Laboratories), according to the manufacturer's instruction. The

absence of contamination by bacteria, yeast, or other microorganisms in the cell culture was confirmed using a mycoplasma detection kit (Sigma). After 48 h, the cells were harvested. JMJD1B overexpression was confirmed by western blotting, and the levels of H3K9me2, H4R3me2s, H4R3me1, and total histone 3 or histone 4 were determined by western blotting.

To knock down JMJD1B and to observe the impact on arginine demethylation of H4R3me2s within cells, a shRNA fragment targeting the coding sequence of JMJD1B was generated using a pair of oligonucleotides, 5'CCGGCCCTAGTTCATCGCAACCTTTCTCGAG AAAGGTTGCGATGAACTAGGGTTTTTG3' and 5'AATTCAAAAACCTAGTTCATCGCAACCTTTC TCGAGAAAGGTTGCGATGAACTAGGG3'. A scrambled shRNA fragment was produced using the oligonucleotides, 5'CCGGCCTAAGGTTAAGTCGCCCTCGCTCGAGCGAGGGCGACTTAACCTTAGGTTTTT3' and 5'AATTCAAAAACCTAAGGTTAAGTCGCCCTCGCTCGAGCGA GGGCGACTTAACCTTAGG3'. The DNA fragments were cloned into the PLKO.1-EGFP plasmid. The HEK293T cells were co-transfected with the PLKO.1-shJMJD1B or PLKO.1-shScramble plasmid, together with the lentiviral packaging vectors pMD2.G (Addgene) and psPAX2 (Addgene), using the Polyjet transfection reagent (Signagen Laboratories). The absence of contamination by bacteria, yeast, or other microorganisms in the cell culture was confirmed using a mycoplasma detection kit (Sigma). After 48 h, the supernatants containing the released viral particles were collected and centrifuged at 2,500 x g to remove the cell debris. The viral particles were then added to nascent HEK293T cells and cultured overnight. The virus-infected HEK293T cells were replaced with fresh virus-free medium and cultured for 36 h. Individual clones of GFP-positive cells were selected by diluting the cells into 96-well plates at one cell per well.

### Analysis and sorting of hematopoietic cells from bone marrow and peripheral blood

Complete blood count (CBC) analysis was conducted for whole blood using a Hemavet 950FS hematology analyzer (Drew Scientific, Miami Lake, FL). BMCs were harvested from femur, tibia and humerus and flow cytometry analysis of lineages in peripheral blood and progenitors in bone marrow were performed as described previously (Akashi et al., 2000). Briefly, the blood cells from WT and JMJD1B<sup>-/-</sup> mice were stained with fluorochrome conjugated antibodies (B220, Gr-1, Mac-1, CD3e, CD4). Similarly, BMCs from WT and JMJD1B<sup>-/-</sup> mice were stained with fluorochrome conjugated antibodies (C-kit, SCA-1, CD34, Flt3, Fcγ-Rα, IL7Ra, CD150, Biotin-lineage). The stained cells were analyzed using a BD LSRFortessa (BD Biosciences, San Jose, CA). Antibodies specific for the following surface antigens were purchased from BD Bioscience: B220 (RA3-6B2), Mac-1 (M1/70), Gr-1 (RB6-8C5), CD4 (GK1.5), CD3e (145-2C11), IL7Rα (SB/199), Sca-1 (D7), TER119(TER-119), CD34 (RAM34), Flt3 (A2F10.1), c-Kit (2B8) FcγRII/III (2.4G2), CD150 (Q38.480), Biotin-Ter119 (TER-119), Biotin-CD3e (145-2C11), Biotin Gr-1 (RB6-8C5), Biotin-Mac-1 (M1/70), Biotin-B220 (RA3-6B2) and Biotin-NK1.1 (PK136).

Hematopoietic stem cell/progenitor/mature populations were sorted based on cell surface marker. Granulocyte-monocyte progenitors were sorted as (Lin<sup>-</sup>, C-kit<sup>+</sup>, CD34<sup>+</sup>, Fcγ-R<sup>hi</sup>), common myeloid progenitors as (Lin<sup>-</sup>, C-kit<sup>+</sup>, CD34<sup>+</sup>, Fcγ-R<sup>mid</sup>), megakaryocyte-erythrocytes progenitors as (Lin<sup>-</sup>, C-kit<sup>+</sup>, CD34<sup>-</sup>, Fcγ-R<sup>-</sup>), hematopoietic stem cell (Lin<sup>-</sup>, SCA-1<sup>+</sup>, C-kit<sup>+</sup>), common lymphoid progenitors as (Lin<sup>-</sup>, IL7Ra<sup>+</sup>, c-Kit<sup>+</sup>, Sca-1<sup>+</sup>, Flt3<sup>+</sup>). Mature granulocyte cells populations from both blood and bone marrow were sorted as Gr-1<sup>+</sup> cells. B lymphocytes and T

lymphocytes were sorted as B220<sup>+</sup> and CD3e<sup>+</sup> cell populations, respectively. If the purity of the sorted population did not reach more than 90%, the sorting was repeated.

### RNA-Seq

Sequencing libraries were prepared with the TruSeq RNA Sample Prep Kit V2 (Illumina; San Diego, CA) according to the manufacturer's instruction. Briefly, poly(A) mRNA was enriched using oligo dT magnetic beads, and reverse transcribed. The resulting double-stranded cDNAs were sheared with Covaris S220 (Covaris, Spalding, UK) with the 200 bp peak, 50 µl volume setting. The fragmented cDNA underwent end repair, 3' end adenylation. Finally, the bar-coded adapters (Illumina) were ligated to the cDNA fragments, and 10 cycles of PCR were performed to produce the final sequencing library. Library templates were prepared for sequencing using the cBot cluster generation system with the HiSeq SR Cluster Kit V4 (Illumina, San Diego, CA). The sequencing run was performed in single read mode for 51 cycles of read 1 and 7 cycles of index read using the HiSeq 2500 platform with the HiSeq SBS Kit V4 (Illumina, San Diego, CA). The real-time analysis (RTA) 2.2.38 software package was used to process the image analysis and base calling. Raw sequence reads were mapped to the mouse genome (mm9) using TopHat v2.0.8b, and the frequency of Refseq genes was counted using HTSeq-0.6.1

### ChIP-Seq

ChIP on native chromatin from HSPCs and BMCs was performed following previously published protocols (Barski et al., 2007; Cuddapah et al., 2009; Girardot et al., 2014) with the following modifications using ChIP-grade Magna protein A/G beads (Cat. No: 16-663, EMB



Millipore) and ChIP-grade antibodies against H4R3me2s (Active motif 61187), H3K9me2 (Abcam, ab1220), and histone H4 (Abcam, ab10158). BMCs were isolated from age-matched WT or JMJD1B<sup>-/-</sup> littermates (n = 4 for each background, 20-24 weeks). Total BMCs and isolated HSPCs were pooled together and nuclei were isolated. The isolated nuclei were incubated for 15 min at 37°C with 4 units/μl of Micrococcal nuclease (M0247, New England Biolabs) to produce >90% mononucleosomes and a small portion of di-nucleosome, as verified by agarose gel electrophoresis. Nucleosomes were precipitated with control IgG or a specific histone antibody. ChIP on histone H4 was used as the reference for total nucleosomes. ChIPed or input DNA was purified with Ampure XP beads (Cat No: A63880, Beckman Coulter).

The input DNA fragments and H4R3me2s, H3K9me2, or histone H4 ChIPed DNA fragments from each sample were barcoded and sequenced on the Illumina HiSeq 2500 to produce 51 bp reads. Reads were base-called using standard Illumina software and aligned to mouse reference genome (mm9) using NovoAlign (<http://www.novocraft.com/>) (Supplemental Table S3). The enrichment of H4R3me2s and H3K9me2 across the genome was analyzed by MACS2 program using p value 0.001 to identify peaks as previously described (Zhang et al., 2008). The enrichment of H4R3me2s or H3K9me2 relative to histone H4 [ $\log_2(\text{ChIP}/\text{ChIP H4})$ ] or relative to the input [ $\text{Log}_2(\text{ChIP}/\text{input})$ ] at the promoter regions throughout the genome was calculated. Briefly, the reads in the window from 1kb upstream of the TSS to the TSS were counted and normalized with the total uniquely mapped reads. The normalized ChIP H4R3me2 or H3K9me2 was divided by the normalized H4 reads or the normalized input reads and log<sub>2</sub>FC was calculated for each gene. A pseudo read was added to each window to avoid abnormally high normalization. In both cases, RefSeq genes (mm9) was used for the gene annotation (Quinlan

and Hall, 2010). The same approach was used to calculate the  $\text{Log}_2\text{FC}(\text{ChIP JMJD1B}/\text{Input})$  and  $\text{Log}_2\text{FC}(\text{ChIP PRMT5}/\text{Input})$ .

### Real-time quantitative-PCR

For mRNA level measurement, the total RNA was extracted using the RNeasy micro Kit (Qiagen, Valencia, CA). The cDNA was synthesized from 2  $\mu\text{g}$  of RNA using SuperScript III RT (Thermo Fisher Scientific). Quantitative real time PCR was performed with Power SYBER Green Master Mix (Applied Biosystems) on a Bio-Rad CFX96 real time system (Bio-Rad, Hercules, CA). ATCB was used as housekeeping loading controls to normalize gene expression using the  $\Delta\Delta\text{Ct}$  method.

For ChIP-qPCR, the input genomic DNA or ChIPed DNA was used as a template. Quantitative real time PCR was performed with Power SYBER Green Master Mix (Applied Biosystems) on a Bio-Rad CFX96 real time system (Bio-Rad, Hercules, CA). The input DNA or ChIPed H4 was used as a normalization control.

### Western blot

Cells were lysed in whole cell extraction buffer (50 mM Tris pH 7.5, 150 mM NaCl, 0.5% NP-40) containing protease inhibitor cocktails (Cat#: 11873580001, Sigma). The protein concentration of each sample was quantified using the Bio-Rad protein assay reagent (Cat#: 5000006, Bio-Rad). For detection of histone and histone modifications, total histones were isolated using the Histone Extraction Kit (Cat#: ab113476, Abcam). Equal amounts of whole cell extracts or total histones were resolved by 4-15% or 15% SDS-PAGE and immunoblotted with

specified antibodies. To detect the loading control including  $\beta$ -actin, GAPDH, histone H3, or histone H4, the blot was stripped and reprobed with an indicated antibody.

## Resources Table

| REAGENT or RESOURCE                            | SOURCE         | IDENTIFIER                        |
|------------------------------------------------|----------------|-----------------------------------|
| Antibodies                                     |                |                                   |
| Mouse monoclonal anti-H3K9me2                  | Abcam          | Cat#: Ab1220<br>RRID: AB_449854   |
| Mouse monoclonal anti-H3K4me2                  | Active Motif   | Cat#: 39679<br>RRID:n/a           |
| Rabbit polyclonal anti- H3R2me2s               | Active Motif   | Cat#: 39703<br>RRID:n/a           |
| Rabbit polyclonal anti- H3R2me2a               | Abcam          | Cat#: Ab80075<br>RRID: AB_1603562 |
| Rabbit polyclonal anti- H3R2me1                | Abcam          | Cat# Ab15584<br>RRID: AB_880446   |
| Rabbit polyclonal anti- H3R8me2s               | Abcam          | Cat# Ab130740<br>RRID:n/a         |
| Rabbit polyclonal anti- H3R8me1                | Active Motif   | Cat#: 39673<br>RRID:n/a           |
| Rabbit polyclonal anti- H3R17me2a              | Active Motif   | Cat#: 39709<br>RRID:n/a           |
| Rabbit polyclonal anti- H3R26 me2a             | EMD Millipore  | Cat#: 07-215<br>RRID: AB_310435   |
| Rabbit polyclonal anti- H4R3me1                | Abcam          | Cat#: Ab17339<br>RRID: AB_873863  |
| Rabbit polyclonal anti- H4R3me2s               | Active Motif   | Cat#:61187<br>RRID:n/a            |
| Rabbit polyclonal anti- H4R3me2a               | Active Motif   | Cat#:39706<br>RRID:n/a            |
| Rabbit polyclonal anti- H3                     | Abcam          | Cat#:Ab1791<br>RRID: AB_302613    |
| Rabbit polyclonal anti- H4                     | Abcam          | Cat#:Ab10158<br>RRID: AB_296888   |
| BUV395 Rat Anti-Mouse CD117                    | BD Biosciences | Cat#: 564011<br>RRID: n/a         |
| APC-Cy <sup>TM</sup> 7 Rat Anti-Mouse Ly-6A/E  | BD Biosciences | Cat#: 560654<br>RRID: AB_1727552  |
| Alexa Fluor® 647 Rat anti-Mouse CD34           | BD Biosciences | Cat#:560230<br>RRID: AB_1645200   |
| PE Rat Anti-Mouse CD135                        | BD Biosciences | Cat#: 553842<br>RRID: AB_395079   |
| PE-Cy <sup>TM</sup> 7 Rat Anti-Mouse CD16/CD32 | BD Biosciences | Cat#: 560829<br>RRID: AB_10563207 |
| BV711 Rat Anti-Mouse CD127                     | BD Biosciences | Cat#: 565490<br>RRID: n/a         |
| BV421 Rat anti-Mouse CD150                     | BD Biosciences | Cat#: 562811<br>RRID: n/a         |

|                                                            |                          |                                   |
|------------------------------------------------------------|--------------------------|-----------------------------------|
| FITC Hamster Anti-Mouse CD48                               | BD Biosciences           | Cat#: 557484<br>RRID: AB_396724   |
| Biotin Rat Anti-Mouse TER-119/Erythroid Cells              | BD Biosciences           | Cat#: 553672<br>RRID: AB_394985   |
| Biotin Hamster Anti-Mouse CD3e                             | BD Biosciences           | Cat#: 553059<br>RRID: AB_394592   |
| Biotin Rat Anti-Mouse Ly-6G and Ly-6C                      | BD Biosciences           | Cat#: 553124<br>RRID: AB_394640   |
| Biotin Rat Anti-Mouse CD45R/B220                           | BD Biosciences           | Cat#: 553085<br>RRID: AB_394615   |
| Biotin Rat Anti-CD11b                                      | BD Biosciences           | Cat#: 557395<br>RRID: AB_2296385  |
| Biotin Mouse Anti-Mouse NK-1.1                             | BD Biosciences           | Cat#: 553163<br>RRID: AB_394675   |
| PE-CF594 Streptavidin                                      | BD Biosciences           | Cat#: 562284<br>RRID: AB_11154598 |
| FITC Rat Anti-Mouse Ly-6G and LY-6C                        | BD Biosciences           | Cat#: 553126<br>RRID: AB_394642   |
| BV421 Rat Anti-CD11b                                       | BD Biosciences           | Cat#: 562605<br>RRID: AB_11152949 |
| BUV395 Hamster Anti-Mouse CD3e                             | BD Biosciences           | Cat#: 563565<br>RRID: n/a         |
| BV711 Rat Anti-Mouse CD4                                   | BD Biosciences           | Cat#: 563050<br>RRID: n/a         |
| PE-Cy™7 Rat Anti-Mouse CD45R/B220                          | BD Biosciences           | Cat#: 552772<br>RRID: AB_394458   |
| Alexa Fluor® 488 anti-mouse CD117 (c-Kit)                  | BioLegend                | Cat#: 105815<br>RRID: AB_493473   |
| Chemicals, Peptides, and Recombinant Proteins              |                          |                                   |
| Recombinant protein human JMJD1B                           | Active motif             | Cat#: 31429<br>RRID:              |
| Propidium iodide                                           | SIGMA-ALDRICH            | Cat#: 11348639001<br>RRID: n/a    |
| DAPI                                                       | SIGMA-ALDRICH            | Cat#: D9542<br>RRID: n/a          |
| Power SYBR™ Green PCR Master Mix                           | Thermo Fisher Scientific | Cat#: 4367659<br>RRID: n/a        |
| Applied Biosystems™ TaqMan™ Reverse Transcription Reagents | Applied Biosystems       | Cat#: N8080234<br>RRID: n/a       |
| Critical Commercial Assays                                 |                          |                                   |
| Direct Lineage Cell Depletion Kit, mouse                   | Miltenyi Biotech         | Cat#: 130-110-470<br>RRID: n/a    |
| Deposited Data                                             |                          |                                   |
| Raw RNA-seq and ChIP-seq data                              | This paper               | GSE94966                          |
| Experimental Models: Cell Lines                            |                          |                                   |
| 293T cells                                                 | ATCC                     | CRL-3216                          |
| Experimental Models: Organisms/Strains                     |                          |                                   |
| JMJD1B knockout mice B6.129P2 background                   | This paper               | n/a                               |
| Oligonucleotides                                           |                          |                                   |

|                      |            |                                      |
|----------------------|------------|--------------------------------------|
| shRNA against JMJD1B | Sigma      | Cat#:<br>TRCN0000017093<br>RRID: n/a |
| Scramble shRNA       | Sigma      | Cat# SHC001<br>RRID: n/a             |
| Recombinant DNA      |            |                                      |
| pEZ-M12-JMJD1B       | This paper | n/a                                  |

## Supplemental References

Akashi, K., Traver, D., Miyamoto, T., and Weissman, I.L. (2000). A clonogenic common myeloid progenitor that gives rise to all myeloid lineages. *Nature* 404, 193-197.

Barski, A., Cuddapah, S., Cui, K., Roh, T.Y., Schones, D.E., Wang, Z., Wei, G., Chepelev, I., and Zhao, K. (2007). High-resolution profiling of histone methylations in the human genome. *Cell* 129, 823-837.

Cuddapah, S., Barski, A., Cui, K., Schones, D.E., Wang, Z., Wei, G., and Zhao, K. (2009). Native chromatin preparation and Illumina/Solexa library construction. *Cold Spring Harbor protocols* 2009, pdb prot5237.

Girardot, M., Hirasawa, R., Kacem, S., Fritsch, L., Pontis, J., Kota, S.K., Filipponi, D., Fabbriozio, E., Sardet, C., Lohmann, F., *et al.* (2014). PRMT5-mediated histone H4 arginine-3 symmetrical dimethylation marks chromatin at G + C-rich regions of the mouse genome. *Nucleic acids research* 42, 235-248.

Quinlan, A.R., and Hall, I.M. (2010). BEDTools: a flexible suite of utilities for comparing genomic features. *Bioinformatics* 26, 841-842.

Walport, L.J., Hopkinson, R.J., Chowdhury, R., Schiller, R., Ge, W., Kawamura, A., and Schofield, C.J. (2016). Arginine demethylation is catalysed by a subset of JmjC histone lysine demethylases. *Nature communications* 7, 11974.

Zhang, Y., Liu, T., Meyer, C.A., Eeckhoute, J., Johnson, D.S., Bernstein, B.E., Nusbaum, C., Myers, R.M., Brown, M., Li, W., *et al.* (2008). Model-based analysis of ChIP-Seq (MACS). *Genome biology* 9, R137.
